# Supplementary material
Source: PubMed Central journal article supplement (PMC4411193)
Supplement: NIHMS677905-supplement.pdf [file NIHMS677905-supplement.pdf]

Supporting Information for

# Stealth filaments: polymer chain length and conformation affect the *in vivo* fate of PEGylated potato virus X

*Karin L. Lee<sup>1</sup>, Sourabh Shukla<sup>1</sup>, Mengzhi Wu<sup>1</sup>, Nadia R. Ayat<sup>1</sup>, Caroline E. El Sanadi<sup>2</sup>, Amy M. Wen<sup>1</sup>, John F. Edelbrock<sup>3</sup>, Jonathan K. Pokorski<sup>3</sup>, Ulrich Commandeur<sup>4</sup>, George R. Dubyak<sup>2</sup>.*

*Nicole F. Steinmetz<sup>1,3,5,6\*</sup>*

Department of <sup>1</sup>Biomedical Engineering, <sup>2</sup>Physiology and Biophysics, <sup>3</sup>Macromolecular Science and Engineering, <sup>5</sup>Radiology, <sup>6</sup>Materials Science and Engineering, Case Western Reserve University Schools of Medicine and Engineering, Cleveland, OH 44106. <sup>4</sup>Institute for Molecular Biotechnology, RWTH Aachen University, Worringer Weg 1, 52074 Aachen, Germany.

\*nicole.steinmetz@case.edu

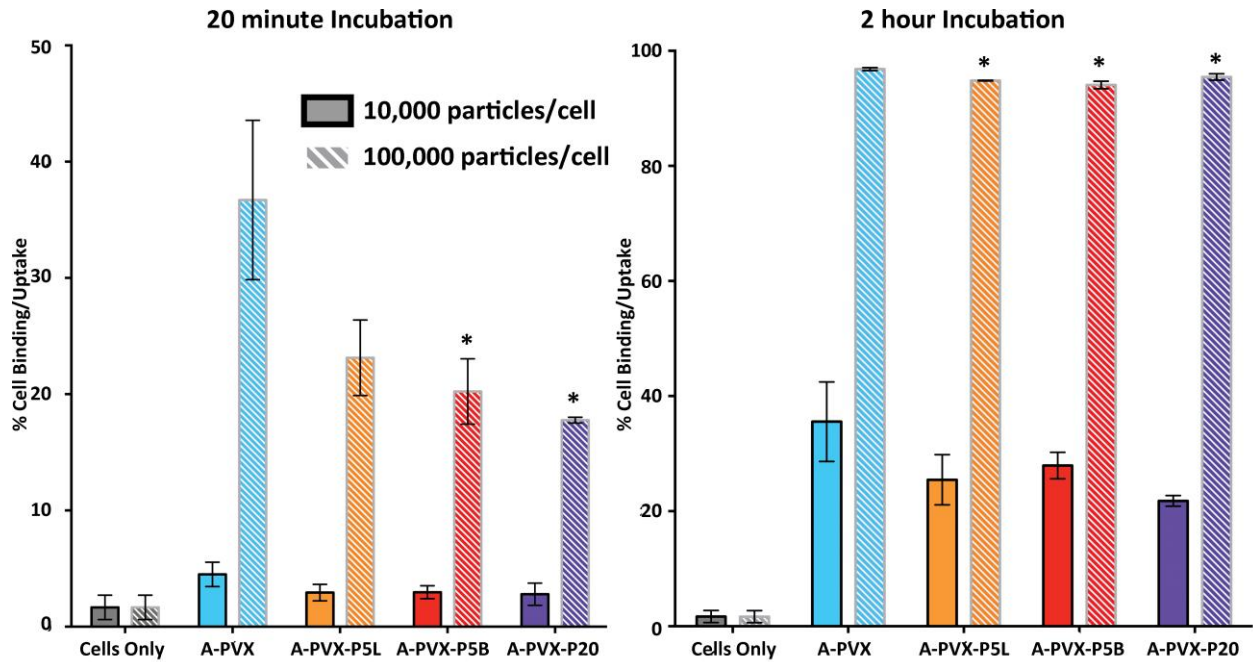

**Supporting Figure S1.** Time and concentration-dependent A-PVX-PEG-cell interactions using RAW264.7 cells and flow cytometry. \*  $p < 0.05$  compared to A-PVX.

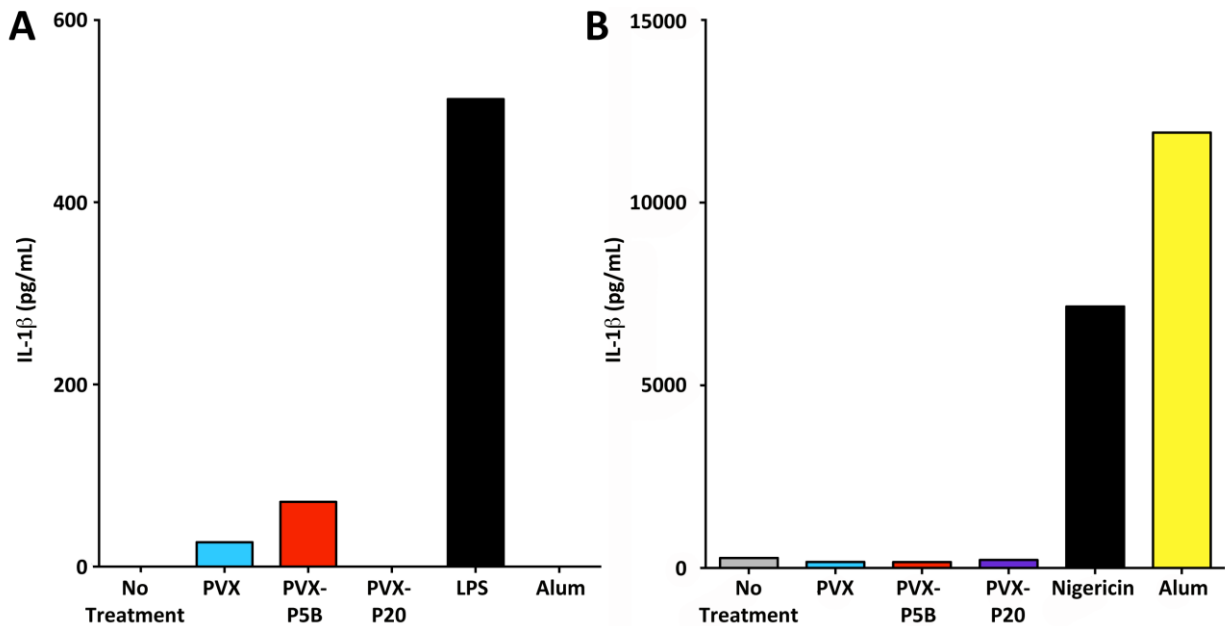

**Supporting Figure S2.** Inflammasome activation as measured by IL-1 $\beta$  production for A) untreated and B) LPS-primed BMDC cells after exposure to PVX-PEG formulations.

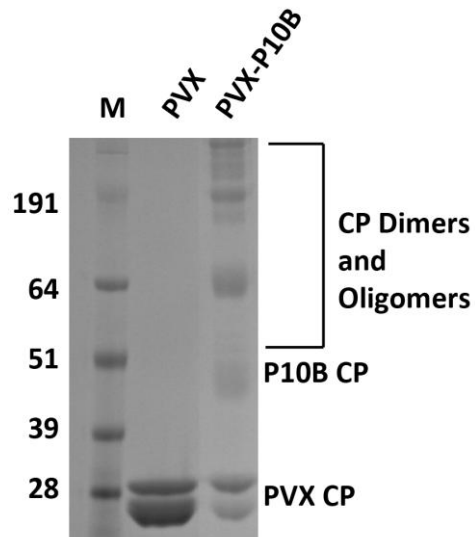

**Supporting Figure S3.** Characterization of PVX-P10B particles. SDS-PAGE analysis to determine number of PEG chains attached. PVX-P10B was synthesized with 609 PEG chains. (Double bands for the PVX CPs at ~ 25 kDa can be explained by a proteolytic cleavage that can occur during purification – this cleavage does not effect the reactivity of the particles nor does it compromise the structural integrity of the samples.)

**Table S1:** Fluorophore and PEG-loading per PVX for the various A/V-PVX-PEG formulations used in each experiment.

| Experiment                   |                                   | PVX                      | PVX-P5L     | PVX-P5B     | PVX-P20                  | PVX-P10B |
|------------------------------|-----------------------------------|--------------------------|-------------|-------------|--------------------------|----------|
| PK <sup>a</sup>              | A647/PVX                          | 334,<br>170 <sup>b</sup> | n/a         | 205         | 496                      | n/a      |
|                              | PEG/PVX                           | n/a                      | n/a         | 470         | 308                      | n/a      |
| Biodistribution <sup>a</sup> | VivoTag or A647 <sup>c</sup> /PVX | 354,<br>427 <sup>b</sup> | n/a         | 204         | 300,<br>177 <sup>b</sup> | n/a      |
|                              | PEG/PVX                           | n/a                      | n/a         | 444         | 566,<br>465 <sup>b</sup> | n/a      |
| Immunogenicity               | A647/PVX                          | n/a                      | n/a         | n/a         | n/a                      | n/a      |
|                              | PEG/PVX                           | n/a                      | 501         | 585         | 494                      | n/a      |
| Sandwich ELISA               | A647/PVX                          | n/a                      | n/a         | n/a         | n/a                      | n/a      |
|                              | PEG/PVX                           | n/a                      | n/a         | 533         | 597                      | 609      |
| FACS (RAW) <sup>b</sup>      | A647/PVX                          | 592,<br>461              | 592,<br>461 | 592,<br>461 | 592,<br>461              | n/a      |
|                              | PEG/PVX                           | n/a                      | 317,<br>468 | 328,<br>471 | 440,<br>389              | n/a      |
| FACS (BMDC)                  | A647/PVX                          | 461                      | 461         | 461         | 461                      | n/a      |
|                              | PEG/PVX                           | n/a                      | 468         | 471         | 389                      | n/a      |
| Cytokine                     | A647/PVX                          | n/a                      | n/a         | n/a         | n/a                      | n/a      |
|                              | PEG/PVX                           | n/a                      | n/a         | 543         | 454                      | n/a      |

<sup>a</sup>Results were normalized for dye loading using a separate standard curve for each particle formulation. <sup>b</sup>Samples were made separately for three studies; data were normalized for each experiment. <sup>c</sup>VivoTag was used for FMT and A647 was used for A-P20 tissue sections and biodistribution.
